# Supplementary material
Source: Elsevier journal article supplement (https://comptes-rendus.academie-sciences.fr/chimie/article/10.1016/j.crci.2010.06.017/file/attach/mmc2.pdf)

# checkCIF/PLATON report

No syntax errors found.    CIF dictionary    Interpreting this report

## Datablock: dl179d

---

Bond precision:    C-C = 0.0080 A                      Wavelength=0.71073

Cell:              a=14.6617(14)            b=12.9745(12)            c=20.0336(19)  
                    alpha=90                      beta=90                      gamma=90

Temperature:      180 K

|                | Calculated      | Reported        |
|----------------|-----------------|-----------------|
| Volume         | 3811.0(6)       | 3811.0(6)       |
| Space group    | P b c a         | P b c a         |
| Hall group     | -P 2ac 2ab      | -P 2ac 2ab      |
| Moiety formula | C14 H32 N2 P, I | C14 H32 N2 P, I |
| Sum formula    | C14 H32 I N2 P  | C14 H32 I N2 P  |
| Mr             | 386.29          | 386.29          |
| Dx,g cm-3      | 1.347           | 1.347           |
| Z              | 8               | 8               |
| Mu (mm-1)      | 1.755           | 1.755           |
| F000           | 1584.0          | 1584.0          |
| F000'          | 1581.38         |                 |
| h,k,lmax       | 18,16,24        | 18,15,24        |
| Nref           | 3767            | 3722            |
| Tmin,Tmax      | 0.663,0.810     | 0.721,0.807     |
| Tmin'          | 0.585           |                 |

Correction method= REFDELTA

Data completeness= 0.988                      Theta(max)= 26.070

R(reflections)= 0.0473( 2480)              wR2(reflections)= 0.1376( 3722)

S = 1.006                                      Npar= 172

---

The following ALERTS were generated. Each ALERT has the format  
**test-name\_ALERT\_alert-type\_alert-level**.  
Click on the hyperlinks for more details of the test.

---

### Alert level C

PLAT094\_ALERT\_2\_C Ratio of Maximum / Minimum Residual Density ....              3.39

---

- 0 ALERT level A = In general: serious problem
- 0 ALERT level B = Potentially serious problem
- 1 ALERT level C = Check and explain

0 ALERT level G = General alerts; check  
0 ALERT type 1 CIF construction/syntax error, inconsistent or missing data  
1 ALERT type 2 Indicator that the structure model may be wrong or deficient  
0 ALERT type 3 Indicator that the structure quality may be low  
0 ALERT type 4 Improvement, methodology, query or suggestion  
0 ALERT type 5 Informative message, check

---

---

### **Publication of your CIF in IUCr journals**

**A basic structural check has been run on your CIF. These basic checks will be run on all CIFs submitted for publication in IUCr journals (*Acta Crystallographica*, *Journal of Applied Crystallography*, *Journal of Synchrotron Radiation*); however, if you intend to submit to *Acta Crystallographica Section C* or *E*, you should make sure that full publication checks are run on the final version of your CIF prior to submission.**

### **Publication of your CIF in other journals**

**Please refer to the *Notes for Authors* of the relevant journal for any special instructions relating to CIF submission.**

---

**PLATON version of 13/08/2009; check.def file version of 12/08/2009**

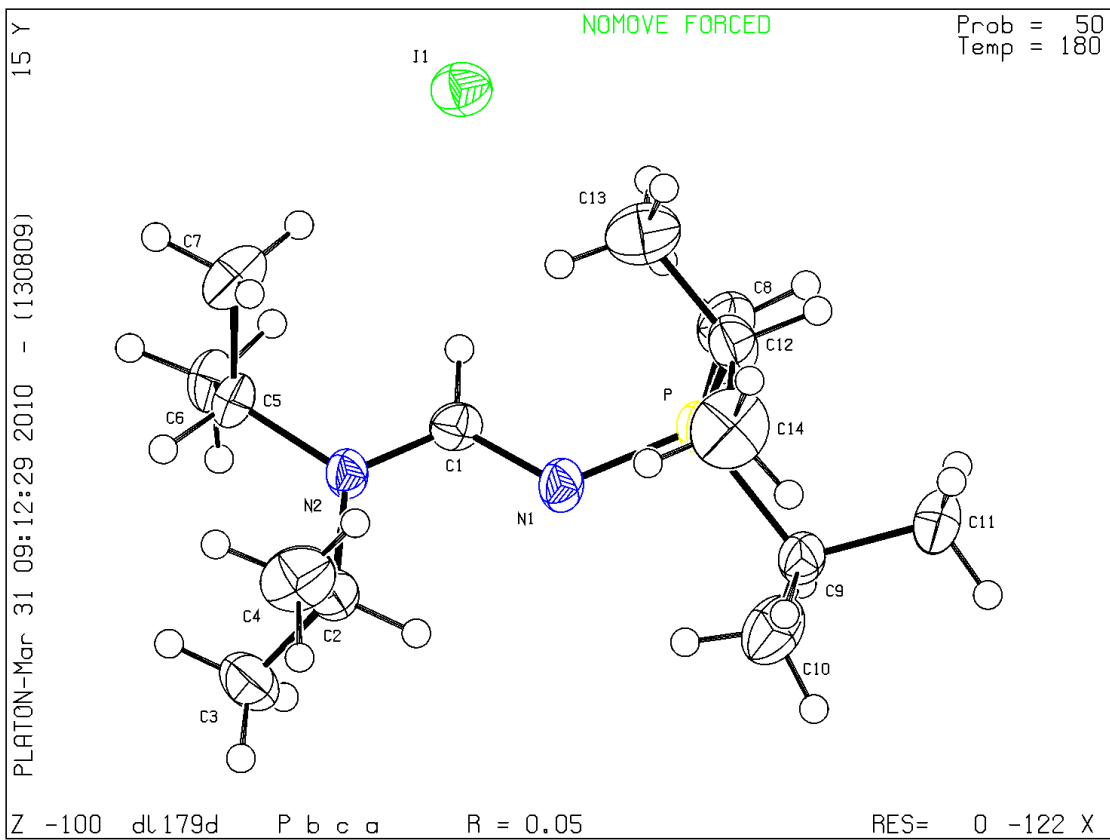

Supplement: mmc2 [file mmc2.pdf]
